# Supplementary material for: Clinical and immunological features in ACKR1/DARC-associated neutropenia
Source: PubMed Central journal article supplement — Blood Adv. 2023 Dec 3;8(3):571–80. doi: 10.1182/bloodadvances.2023010400 (PMC10837479; doi:10.1182/bloodadvances.2023010400), 2023-12-03

## **Palmblad et al - Supplemental Material**

- 1. Supplemental material on subjects and methods, on Results**
- 2. Supplemental tables**
- 3. Supplemental figures**

# Supplemental material on subjects and methods, and on Results

## Subjects and methods

*The databases.* Two databases were used. The first, The Stockholm Neutropenia Study (SNeuPS) contains data on all neutropenic patients (appr 360 persons) referred to the hematological outpatient clinics of Depts. of Stockholm South Hospital (1972-1997) and Karolinska University Hospital Huddinge (1997-2018), Stockholm, Sweden (data to be published). Those who had a family basis in Africa, the Near/Middle East and the Mediterranean area as well as any person with familial neutropenias (NPs) were screened for ADAN. Before 2015, only a full blood group genotyping was available to identify the rs2814778 variation (also known as the Fy\*B\_GATA SNP) but from 2015, a specific PCR for this SNP was introduced at the Karolinska University Hospital Blood Bank and was used for subsequent genotypings.

Referrals of neutropenic individuals originated from GPs or secondary hospitals in the Stockholm County area (covering approximately 1.5 to 2.3 million inhabitants over the actual time-period) but also from all over Sweden. Supplemental Figure 1 gives the evaluation algorithm.<sup>21</sup>

Migrants from Near/Middle East and East Africa (mostly Eritrea, Ethiopia and Iraq; see Supplemental Table 1) constituted the majority of referred ADAN persons during 2010-2018. One person had a mixed Swedish and Maldivian background.

The second database included the laboratory records of the Platelet and Granulocyte Laboratory, Dept of Clinical Immunology and Transfusion Medicine, Karolinska University Hospital, Stockholm, Sweden, performing the ADAN genetic testing. Since those samples originated from different regions in Sweden, clinical data were unavailable for analysis (n=24). These persons were, however, also included for evaluations of autoantibodies to neutrophils and hCAP-18/pro-LL-37 plasma levels.

As healthy controls served three cohorts: The first consisted of 94 healthy blood donors used for the Pro-LL-37 analysis, as described and published previously<sup>22</sup>. The second cohort was made up from 102 healthy doors for the GIFT analysis (this study). It consisted of 42 males (mean age 52,5 years, range 19-76) and 62 females (mean age 50,5 years, range 22-74) representing all blood groups. Samples for this cohort were retrieved anonymized from standard control blood typing tubes collected from the donors according to standard procedures. (3) 20 healthy controls included in a study on the role of NK cells in NP.<sup>23</sup>

*Inclusions and exclusions.* Patients were initially evaluated for the cause of NP by methods available at that time, but also re-evaluated continuously with novel techniques. Basically, we followed the algorithm in Supplemental Figure 1. All patients were tested for a CBC, hepatic and renal functions, cobalamin and folate blood levels, serum electrophoresis, HIV and hepatitis A, B and C serology, as well as screened for antinuclear (ANA) and related autoantibodies for autoimmune disorders. Most were also tested for antineutrophil antibodies, usually several times (vide infra). Patients who were referred for characterization of a NP but had a previous diagnosis of a viral disorder or an autoimmune systemic disorder (such as rheumatoid arthritis (RA), SLE, Sjögren syndrome, systemic sclerosis etc) were not included in the present analysis. Some ADAN persons (n=28) were evaluated by a bone marrow (BM) biopsy, particularly those with bi- or pancytopenias and all with a suspicion of a hematological malignancy, including MDS. Thus, with exception of a few, where anemia was caused by iron deficiency (which was treated during the course of the follow-up) or was diagnosed due to thalassemia (n=5), or where mild thrombocytopenia (blood platelet count  $<100 \times 10^9/L$ ) was part of an autoimmune disorder, all had isolated NP. The follow up was performed by us or, if applicable, by nationwide Swedish Registries for MDS and acute leukemias.

*ACKR1-variation analysis, anti-neutrophil antibody testing and hCAP-18/pro-LL-37 quantification.* For the *ACKR1*-polymorphism analysis, DNA was extracted from EDTA preserved peripheral blood samples with QIAamp DNA Mini kit (Qiagen, Sollentuna, Sweden) and Fy\*B (GATA -67T>C) allele genotyping was performed using TaqMan SNP Genotyping Assay C\_15769614\_10, according to the manufacturers' instruction (Fisher Scientific, Gothenburg, Sweden). The readout was the presence or absence of the Fy\*B\_GATA allele (i.e. the rs2814778 SNP in *ACKR1*) and/or the wildtype Fy\*B allele.

Plasma extracted from EDTA preserved peripheral blood samples was tested for the presence of anti-neutrophil antibodies using the Granulocyte Agglutination Test (GAT) and the Granulocyte Immunofluorescence Test (GIFT), as described.<sup>26</sup> Some control samples were also analyzed using bead-based screening method on the Luminex platform, LabScreen Multi (LSM, Thermo Fisher Scientific). Neutrophil-reactive samples were in all cases tested for the presence of anti-HLA-class 1-antibodies as HLA antibodies can obscure interpretations of both GAT and GIFT, using using Lifecode QuikScreen ELISA (ImmuCor) (before Jan 2017), LabScreen Mixed (One Lambda) (December 2017-2019) and LabScreen Multi (One Lambda) (from January 2020). If positive GAT or/and GIFT tests were noted, and/or the person had HLA-

antibodies, a monoclonal-antibody-specific immobilization of granulocyte antigens (MAIGA) test was used for detection of specific antibodies to CD16, CD11a/b and CD177.<sup>21,26,36</sup> Thus, if GIFT/GAT and HLA tests all were positive, the neutrophil autoantibody was considered negative, unless also specific antibodies to CD11a/b, CD16a/b and/or CD177 were detected.

Plasma levels of the antibacterial peptide cathelicidin (hCAP-18 or Pro-LL-37), previously shown to discriminate SCNPs from other NP forms<sup>27</sup>, was analyzed using an in-house ELISA.<sup>22</sup>

#### *Blood monocyte phenotyping*

Frozen PBMC samples from seven ADAN subjects and eleven age-matched healthy controls were thawed and washed with ice-cold PBS supplemented with 2% fetal calf serum and 1 mM EDTA. Cells were stained on ice for 20 min using the following antibodies (clones given in brackets): anti-CD3 APC-Cy7 (SK7), anti-CD11c PE-Cy7 (B-ly6), anti-CD14 V450 (MΦP9), anti-CD16 APC (3G8), anti-CD19 APC-H7 (HIB19), anti-CD20 APC-Cy7 (L27), anti-CD45 Alexa Fluo700 (HI30), anti-CD56 PE (MY31), anti-CD123 PerCP-Cy5.5 (7G3), anti-HLA-DR V500 (G46-6) (BD Biosciences, San Diego, CA, USA); anti-SLAN FITC (DD-1) (Miltenyi, Bergisch Gladbach, Germany). The cells were washed as before and 7-AAD (BD Biosciences) was added to the samples to identify dead cells. Cells were acquired immediately after staining on a BD LSR II Fortessa (BD Biosciences) and the data was analyzed using FlowJo v9.9.6 (Treestar, Ashland, OR, USA). The gating of different populations is described in Supplemental figure 2.

#### *Bone marrow examinations (BME).*

Twenty-eight ADAN subjects had been evaluated by a BM biopsy, including a BM flow cytometry, particularly those presenting with a clinical suspicion of a hematological malignancy, eg. MDS. Retrieved BM samples (n=17) were re-evaluated in 2019-20 regarding signs of a neutrophil maturation arrest at the (pro)myelocyte stage (typical for severe congenital NP due to *ELANE* or *HAX-1* mutations<sup>6,24,25</sup>), signs of MDS or other pathologies. The maturation index (MI) of the neutropoiesis was calculated according to the formula (myeloblasts + promyelocytes + myelocytes) / (metamyelocytes + band and segmented neutrophils); the normal value is 1:3-1:5 (i.e. 0.20-0.33).<sup>24,25</sup> BM marrow cellularity was assessed according to routine evaluations at the Dept of Clinical Pathology, Karolinska University Laboratory (the normal values for adults being 40-60%).<sup>24,25</sup>

## **Supplemental Results**

### *Clinical findings*

Patients, initially presenting with mild iron or folate deficiency, did not change the ANC upon replenishing iron or folate stores. Four subjects presented with mild microcytic alpha-thalassemia. Seven subjects displayed mild, stable thrombocytopenia ( $130-150 \times 10^9/L$ ) and one with mild immunologic thrombocytopenia.

### *Bone marrow examinations (BME)*

Upon referral to the tertiary center for evaluation of neutropenia, 28/66 persons with available clinical data underwent a BME as part of the routine work-up, particularly due to the clinical suspicion of MDS. The original reports concluded that insignificant dysplasias, or features suggesting large granular lymphocytic syndromes, could be seen in 9/28 samples. Complementary flow cytometry analyses of BM cells in these persons showed no signs of abnormal cell populations. Also, remaining suspicions of MDS conferred repeated BME in several individuals (prior to the ADAN diagnosis). However, upon a systematic re-evaluation of the BME, as part of this study, no evidence of diagnostic dysplastic features, maturation arrests in the myeloid series or abnormal cellularity could be observed. Thus, the BMs showed no evidence of pathologies related to MDS or any other hematological disorder.

## **References**

References and their numbers in the Supplemental material are identical to those in the main text.

## Supplemental tables

**Supplemental Table 1. Countries of origin for the ADAN subjects\***

|                |    |          |     |
|----------------|----|----------|-----|
| Brazil         | 1  | Liberia  | 1   |
| Cameroun       | 1  | Morocco  | 1   |
| Congo-Kinshasa | 1  | Maldives | 1   |
| Egypt          | 3  | Nigeria  | 1   |
| Eritrea        | 16 | Senegal  | 3   |
| Ethiopia       | 7  | Somalia  | 1   |
| Gambia         | 2  | Togo     | 2   |
| Ghana          | 3  | Tanzania | 2   |
| Ivory Coast    | 1  | Uganda   | 3   |
| Iraq           | 4  | USA      | 1** |
| Jordan         | 1  |          |     |

Three ADAN persons were born in Sweden by parents from one of the listed countries; all others were 1<sup>st</sup> generation migrants. One had a mixed Swedish-Maldivian background.

\*\*denote an African-American person with ADAN siblings.

**Supplemental Table 2. Other diseases in the ADAN cohort.**

Gastrointestinal disorder

Peptic ulcer 2

Esophagitis 1

Celiac disease 1

Colonic polyposis 1

Respiratory tract/Allergic disorder

Asthma 2

Nasal polyposis 1

Lung cancer 1

Anaphylactoid reaction 1

Food allergy 1

Cardiovascular disorder

Cerebral vascular malformation 1

Aortic valve insufficiency 1

Hypertension 2

Skin and muscle disorder

Bullous pemphigoid disease 1

Fibromyalgia 1

Psychiatric disorder

Schizophrenia 1

Nervous system/eye and ear disorder

Headache /migraine 3

Ocular cavernoma 1

Sudden deafness 1

Glaucoma 1

Endocrine disorder

Diabetes type 2 1

Prolactinoma 1

Thyroid disease 2

Blood disorder

ITP 1

Chronic myeloid leukemia 1\*

Essential thrombocythemia and  
polycythemia vera 2\*

Thalassemia minor 4

Bleeding tendency NUD 1

Autoimmune disease

SLE 1\*

\*excluded from the clinical evaluation. – The chronic myeloid leukemia, the essential thrombocythemia and the polycythemia vera cases were diagnosed according to WHO criteria, including appropriate genetic markers.

**Supplemental Table 3. Plasma cytokines analyzed by Olink.**

| Proteins       | HD median | ADAN median | p values   | Comments                                              |
|----------------|-----------|-------------|------------|-------------------------------------------------------|
| NEMO           | 8,01      | 7,41        | 1,7374E-05 | controlling and upregulating NFkB function            |
| IL-18R1        | 7,35      | 6,785       | 0,00338792 |                                                       |
| HO-1           | 12,89     | 12,135      | 0,0038371  | possible positive regulator of myelopoiesis           |
| CEACAM1        | 7,16      | 6,81        | 0,00493259 | angiogenesis promotor; integrin-mediated signaling    |
| CCL23          | 10,49     | 9,61        | 0,00595196 |                                                       |
| PDL1           | 4,955     | 4,41        | 0,00668246 |                                                       |
| VEGFR-2        | 6,99      | 6,78        | 0,00842328 | angiogenesis promotor                                 |
| ERBB2/HER2     | 6,67      | 6,4         | 0,00938016 | tumor progression incl angiogenesis                   |
| MIA            | 9,68      | 10,12       | 0,01048218 |                                                       |
| IL-7           | 5,24      | 4,36        | 0,01178444 |                                                       |
| CYR61          | 5,54      | 6,48        | 0,01277318 | reprogramming macrophages towards M1 polarization     |
| TRANCE         | 4,57      | 3,755       | 0,01336345 |                                                       |
| CD244          | 7,45      | 6,995       | 0,01466654 |                                                       |
| FGF-BP1        | 4,69      | 5,11        | 0,01896533 | chemotactic glycoprotein, growth factor               |
| HB-EGF         | 6,965     | 5,945       | 0,01938931 | blocking neutrophil/endothelial adhesion              |
| ITGAV          | 3,16      | 2,92        | 0,02068506 | phagocytosis regulations, integrin-mediated adhesion  |
| PTX3           | 2,82      | 2,425       | 0,02236387 | phagocytosis regulation, neutrophil degranulation     |
| OSM            | 4,065     | 2,77        | 0,02277433 |                                                       |
| PSGL-1         | 4,615     | 4,18        | 0,02428952 | regulating neutrophil/endothelial adhesion            |
| FS             | 11,03     | 10,165      | 0,02843263 |                                                       |
| CASP-8         | 4,535     | 5,64        | 0,0300567  |                                                       |
| ANG-1/ ANGPT-1 | 10,295    | 10,56       | 0,03070843 | angiogenesis driver, reducing duration of neutropenia |
| IL-16          | 6,315     | 5,74        | 0,03307128 | pro-inflammatory pleiotropic cytokine                 |
| CEACAM8        | 4,115     | 2,665       | 0,03573217 | marker for neutrophils, released on cell activation   |
| IL-1RA         | 6,72      | 6,21        | 0,03906528 | anti-inflammatory, protects against neutrophil damage |
| FCRLB          | 0,98      | 2,4         | 0,04269162 | Fc receptor family, regulating phagocytosis, ADCC     |
| MERTK          | 5,28      | 4,825       | 0,04450037 | driving monocyte polarization towards a M2 phenotype  |
| KIM-1/HAVRC1   | 6,62      | 5,77        | 0,04790331 | tissue injury marker, response to viral infections    |

4E-BP1  
5'-NT  
ABL1ACE2  
ADAM 8  
ADAM-TS13  
ADAM-TS 15  
ADM  
AGRP  
ANXA1  
AR  
ARTN  
AXIN1  
Beta-NGF  
BDNF

BNP  
CA5A  
CA9  
CCL3  
CCL4  
CCL11  
CCL17  
CCL20  
CCL25  
CCL28  
CD4  
CD5  
CD6  
CD27  
CD40

CD40-L  
CD70  
CD84  
CD160  
CD207  
CEACAM5  
CPE  
CSF-1  
CST5  
CTRC  
CTSL1  
CTSV  
CXCL1  
CXCL5  
CXCL6

CXCL10  
CXCL11  
CXCL13  
CXL17  
DECR1  
DNER  
DCN  
Dkk-1  
DKN1A  
DLL1  
DNER  
EGF  
EN-RAGE  
EPHA2  
ERBB3



|           |               |                |           |
|-----------|---------------|----------------|-----------|
| ESM-1     | IL1RL2        | PAR-1          | TFPI-2    |
| FABP2     | IL-4RA        | PARP-1         | TGF-alpha |
| FADD      | IL-6          | PDGF subunit B | TGF-b1    |
| FASLG     | IL-8          | PD-L2          | TGFR-2    |
| FcR2I-IgG | IL-10         | PIGF           | TGM2      |
| FGF-5     | IL-10RB       | PigR           | THBS2     |
| FGF-19    | IL-10RA       | PODXL          | THPO      |
| FGF-21    | IL-12B        | PPY            | TLR3      |
| FGF-23    | IL-17C        | PRELP          | TM        |
| Fh3L      | IL-18         | PRSS8          | TNFB      |
| FR-alpha  | IL-24         | PRSS27         | TNFRSF4   |
| FR-gamma  | IL-27         | Protein BOC    | TNFRSF9   |
| FURIN     | ITGB5         | PVRL4          | TNFRSF10A |
| Gal-1     | ITGB1BP2      | RAGE           | TNFRSF11A |
| Gal-9     | KLK13         | REN            | TNFRSF13B |
| GIF       | LAP           | RSPO3          | TNFRSF19  |
| GH        | LEP           | S100A4         | TNFSF14   |
| GLO1      | LIF-R         | SCAMP3         | TRAIL-R2  |
| GPNMB     | LOX-1 LPL     | SCF            | TWEAK     |
| GT        | LY9           | SERPINA12"     | TXLNA     |
| GZMB      | LYN           |                | VEGFR-3   |
| GZMH      | LYPD3         | SEZ6L          | VEGF-D    |
| HAOX1     | MAD homolog 5 | SIRT2          | WIF-1     |
| HGF       | MCP-2         | SLAMF1         | VIM       |
| hK8       | MCP-3         | SLAMF7         | WFDC2     |
| hK14      | MetAP 2       | SORT1          | WISP-1    |
| hK11      | MIC-A/B       | SPARC SRC      | XCL1      |
| hOSCAR    | MMP-1         | ST1A1          | XPNPEP2   |
| HSP 27    | MMP-7         | STAMPB         |           |
| IDUA      | MSLN          | SYND1          |           |
| IFN-g-R1  | MUC-16        | TCL1A          |           |
| IGF1R     | PAPPA         | TF             |           |

*Abbreviations and color codes:* ADAN=ACR1/DARC associated neutropenia (n=4-6, where those with n=4 are marked in grey letters, not discussed further). HD=Healthy donors (n=19-20).

Proteins of interest for **inflammation, myelopoiesis, neutrophil and monocyte function and differentiation (n=12)** are marked in **red letters**, those of interest for **vascular biology/apoptosis (n=3)** are marked in **blue letters**. Three genes, implicated in both set of processes, are marked in **red/blue**. **Green** letters in the ADAN column denote 5 up-regulated genes in ADAN; all others are down-regulated. **Yellow** overlay mark proteins assumed to be involved in the "cytokine sink hypothesis".<sup>38</sup> The comments refer to involvement in biological processes related to ADAN. Proteins above the dividing line (====) mark those with a p-value <0.05 (n=28) and proteins under the line were measured but have a p-value >0.05. NB that none of the differences in this table showed a p-value <0.05 when adjusted for multiple comparisons, with exception of NEMO (p=0.004).

**Supplemental Table 4. Serum concentrations of G-CSF, M-CSF and GM-CSF in ADAN subjects (n=7) and healthy donors (HD; n=6).**

| <b>Growth factor</b> | <b>ADAN</b> | <b>HD</b> | <b>P value</b> |
|----------------------|-------------|-----------|----------------|
| G-CSF, pg/mL         | 61.8±20.1   | 42.4±23.3 | >0.05          |
| M-CSF, pg/mL         | 39.0±39.4   | 35.5±15.0 | >0.05          |
| GM-CSF, pg/mL        | 0.93±0.22   | 1.58±0.90 | >0.05          |

---

Mean ±SD values. HD=healthy donors

## Supplemental Table 5. Gene ontology (GO) terms for the ADAN Olink protein network.

Filtered for FDR <0.01 and fold enrichment above 10.

| <b>Gene ontology (GO) term</b>                               | <b># proteins<sup>1</sup></b> | <b>of hits<sup>2</sup></b> | <b>fold enrichment</b> | <b>p-value</b> |
|--------------------------------------------------------------|-------------------------------|----------------------------|------------------------|----------------|
| regulation of cytokine production                            | 737                           | 11                         | 12,8                   | 8,49E-07       |
| regulation of leukocyte activation                           | 667                           | 10                         | 12,86                  | 4,62E-06       |
| regulation of cell activation                                | 722                           | 10                         | 11,88                  | 6,53E-06       |
| cytokine-mediated signaling pathway                          | 384                           | 8                          | 17,87                  | 9,38E-06       |
| response to cytokine                                         | 819                           | 10                         | 10,47                  | 1,14E-05       |
| positive regulation of cytokine production                   | 477                           | 8                          | 14,39                  | 2,82E-05       |
| cellular response to cytokine stimulus                       | 725                           | 9                          | 10,65                  | 3,58E-05       |
| hemopoiesis                                                  | 617                           | 8                          | 11,12                  | 1,16E-04       |
| hematopoietic or lymphoid organ development                  | 666                           | 8                          | 10,3                   | 1,93E-04       |
| regulation of cell-cell adhesion                             | 471                           | 7                          | 12,75                  | 2,71E-04       |
| positive regulation of cell adhesion                         | 476                           | 7                          | 12,62                  | 2,85E-04       |
| regulation of ERK1 and ERK2 cascade                          | 300                           | 6                          | 17,16                  | 3,24E-04       |
| inflammatory response                                        | 528                           | 7                          | 11,37                  | 4,70E-04       |
| wound healing                                                | 335                           | 6                          | 15,36                  | 5,27E-04       |
| negative regulation of leukocyte activation                  | 189                           | 5                          | 22,7                   | 6,51E-04       |
| positive regulation of locomotion                            | 566                           | 7                          | 10,61                  | 6,94E-04       |
| regulation of leukocyte cell-cell adhesion                   | 356                           | 6                          | 14,46                  | 6,99E-04       |
| negative regulation of cell activation                       | 211                           | 5                          | 20,33                  | 1,00E-03       |
| positive regulation of acute inflammatory response           | 26                            | 3                          | 98,99                  | 1,08E-03       |
| epithelial cell proliferation                                | 94                            | 4                          | 36,51                  | 1,08E-03       |
| negative regulation of extrinsic apoptotic signaling pathway | 97                            | 4                          | 35,38                  | 1,15E-03       |
| regulation of epithelial cell migration                      | 228                           | 5                          | 18,81                  | 1,28E-03       |
| regulation of phagocytosis                                   | 102                           | 4                          | 33,64                  | 1,30E-03       |
| leukocyte migration                                          | 233                           | 5                          | 18,41                  | 1,37E-03       |
| negative regulation of immune system process                 | 420                           | 6                          | 12,26                  | 1,41E-03       |
| regulation of phosphatidylinositol 3-kinase signaling        | 107                           | 4                          | 32,07                  | 1,47E-03       |
| response to wounding                                         | 441                           | 6                          | 11,67                  | 1,79E-03       |
| positive regulation of protein kinase B signaling            | 116                           | 4                          | 29,58                  | 1,93E-03       |
| female sex differentiation                                   | 117                           | 4                          | 29,33                  | 1,95E-03       |
| regulation of interferon-gamma production                    | 117                           | 4                          | 29,33                  | 1,97E-03       |
| positive regulation of leukocyte activation                  | 458                           | 6                          | 11,24                  | 2,12E-03       |
| ERK1 and ERK2 cascade                                        | 37                            | 3                          | 69,56                  | 2,20E-03       |
| positive regulation of cell activation                       | 475                           | 6                          | 10,84                  | 2,36E-03       |
| protein kinase B signaling                                   | 39                            | 3                          | 65,99                  | 2,42E-03       |
| positive regulation of MAPK cascade                          | 481                           | 6                          | 10,7                   | 2,45E-03       |
| negative regulation of cytokine X activation                 | 282                           | 5                          | 15,21                  | 2,66E-03       |
| regulation of angiogenesis                                   | 285                           | 5                          | 15,05                  | 2,77E-03       |

|                                                                                                                             |     |   |       |          |
|-----------------------------------------------------------------------------------------------------------------------------|-----|---|-------|----------|
| positive regulation of kinase activity                                                                                      | 495 | 6 | 10,4  | 2,80E-03 |
| regulation of vasculature development                                                                                       | 289 | 5 | 14,84 | 2,90E-03 |
| chemotaxis                                                                                                                  | 513 | 6 | 10,03 | 3,32E-03 |
| positive regulation of inflammatory response                                                                                | 142 | 4 | 24,17 | 3,34E-03 |
| regulation of leukocyte differentiation                                                                                     | 306 | 5 | 14,02 | 3,59E-03 |
| regulation of acute inflammatory response                                                                                   | 48  | 3 | 53,62 | 3,83E-03 |
| regulation of extrinsic apoptotic signaling pathway                                                                         | 153 | 4 | 22,43 | 4,16E-03 |
| positive regulation of NF-kappaB transcription factor activity                                                              | 154 | 4 | 22,28 | 4,20E-03 |
| negative regulation of lymphocyte activation                                                                                | 159 | 4 | 21,58 | 4,58E-03 |
| negative regulation of secretion                                                                                            | 165 | 4 | 20,8  | 5,03E-03 |
| regulation of epithelial cell proliferation                                                                                 | 337 | 5 | 12,73 | 5,06E-03 |
| regulation of production of molecular mediator of immune response                                                           | 169 | 4 | 20,3  | 5,34E-03 |
| regulation of endothelial cell migration                                                                                    | 169 | 4 | 20,3  | 5,38E-03 |
| positive regulation of fever generation                                                                                     | 7   | 2 | > 100 | 5,40E-03 |
| regulation of protein kinase B signaling                                                                                    | 169 | 4 | 20,3  | 5,43E-03 |
| positive regulation of neutrophil activation                                                                                | 7   | 2 | > 100 | 5,44E-03 |
| regulation of adaptive immune response based on somatic recombination of immune receptors built from Ig superfamily domains | 176 | 4 | 19,5  | 6,01E-03 |
| natural killer cell activation                                                                                              | 61  | 3 | 42,19 | 6,26E-03 |
| regulation of immune effector process                                                                                       | 363 | 5 | 11,82 | 6,35E-03 |
| leukocyte differentiation                                                                                                   | 363 | 5 | 11,82 | 6,40E-03 |
| regulation of T cell activation                                                                                             | 366 | 5 | 11,72 | 6,46E-03 |
| regulation of fever generation                                                                                              | 9   | 2 | > 100 | 7,57E-03 |
| positive regulation of heat generation                                                                                      | 9   | 2 | > 100 | 7,62E-03 |
| regulation of adaptive immune response                                                                                      | 191 | 4 | 17,97 | 7,53E-03 |
| positive regulation of I-kappaB kinase /NF-kappaB signalin                                                                  | 190 | 4 | 18,06 | 7,54E-03 |
| negative regulation of cell-cell adhesion                                                                                   | 192 | 4 | 17,87 | 7,63E-03 |
| positive regulation of epithelial cell proliferation                                                                        | 194 | 4 | 17,69 | 7,89E-03 |
| regulation of hemopoiesis                                                                                                   | 386 | 5 | 11,11 | 7,84E-03 |
| positive regulation of chemokine production                                                                                 | 71  | 3 | 36,25 | 8,78E-03 |
| MAPK cascade                                                                                                                | 202 | 4 | 16,99 | 8,96E-03 |
| positive regulation of macroautophagy                                                                                       | 73  | 3 | 35,26 | 9,26E-03 |
| positive regulation of phagocytosis                                                                                         | 73  | 3 | 35,26 | 9,32E-03 |
| cell chemotaxis                                                                                                             | 208 | 4 | 16,5  | 9,69E-03 |

# Supplemental figures

Supplemental figure 1. Algorithm for evaluation of an adult patient with neutropenia.

Adapted from reference <sup>21</sup>.

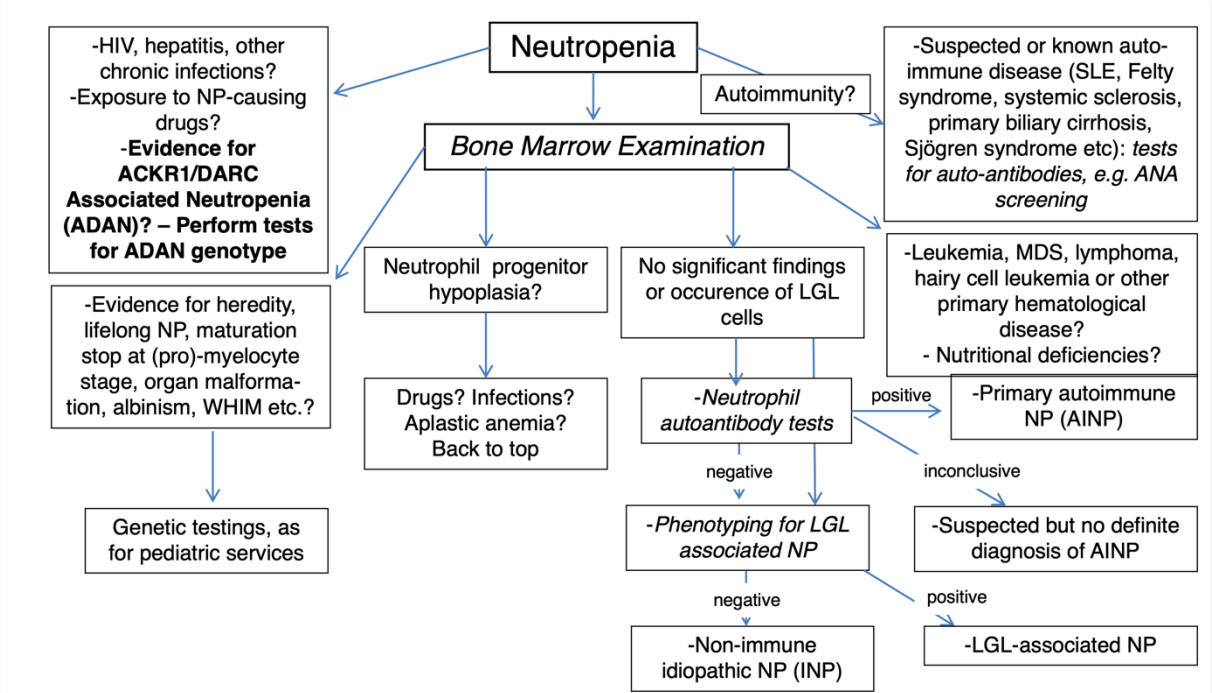

## Supplemental figure 2. Gating strategy for monocyte and dendritic cell phenotyping.

Events were gated on single cells using FSC-Area vs. FSC-Height, and SSC-Area vs. SSC-Height. Live cells were gated as 7-AAD-negative events from single cells.

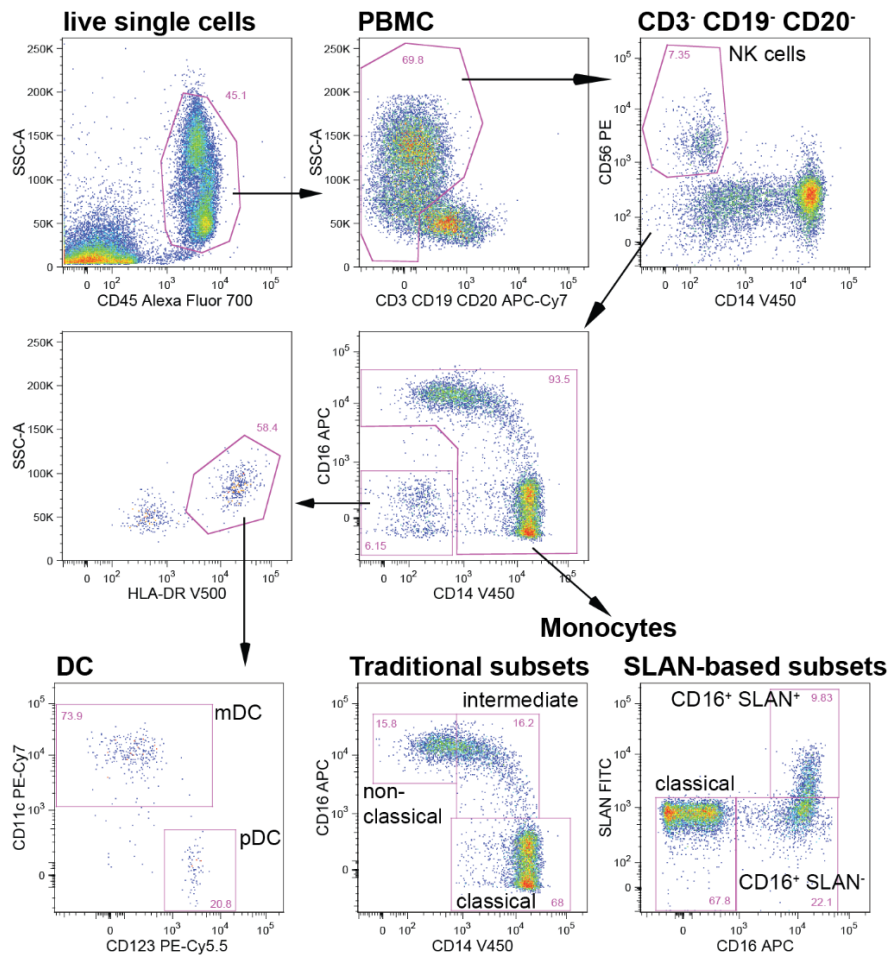

**Supplemental figure 3. Spearman correlation analysis for the 28 proteins significantly differentially regulated in ADAN.**

Panel A shows the significant ( $P < 0.05$ ) correlation analyses, where green fields denote a significant correlation. Panel B shows the r-values, where a blue field represents a positive correlation and a red a negative, according to the scale on the right side of the figure.

**A**

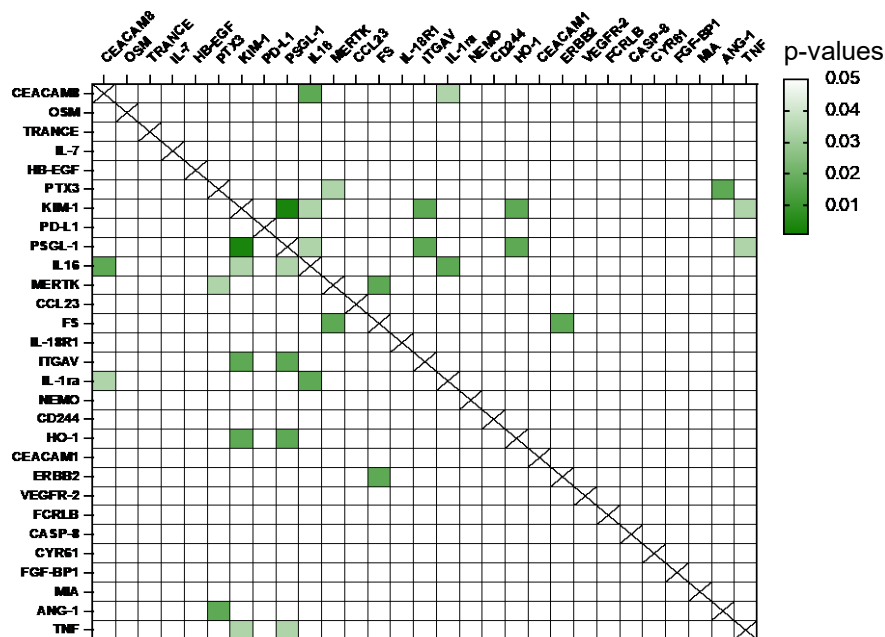

**B**

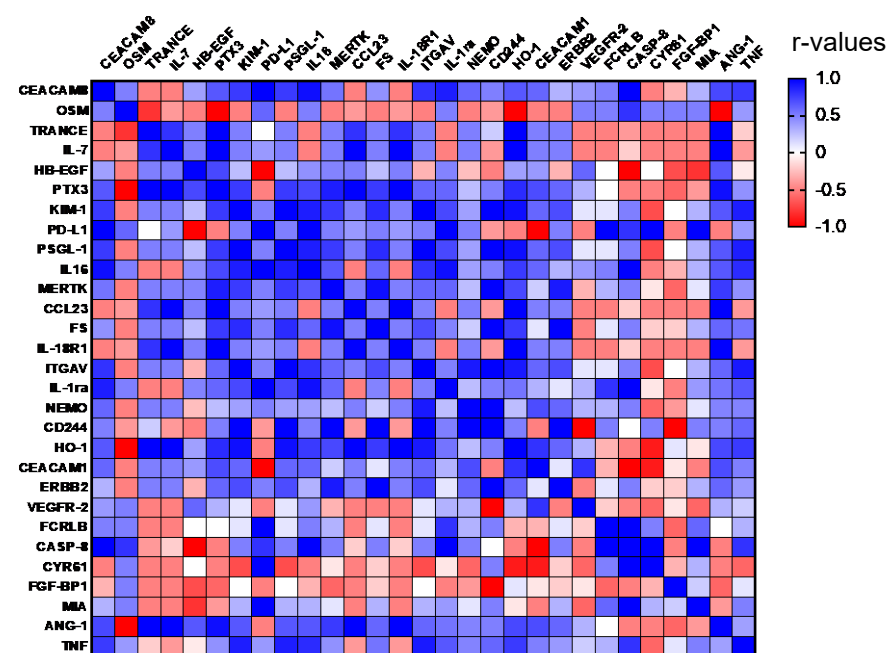

Supplement: BLOODA_ADV-2023-010400-mmc1.pdf [file BLOODA_ADV-2023-010400-mmc1.pdf]
